# Supplementary material for: Predictors of Return to Work Following Primary Arthroscopic Rotator Cuff Repair: An Analysis of 1502 Cases
Source: PubMed Central journal article supplement — Am J Sports Med. 2023 Feb 20;51(4):893–900. doi: 10.1177/03635465231152479 (PMC10026167; doi:10.1177/03635465231152479), 2023-02-20
Supplement: sj-pdf-1-ajs-10.1177_03635465231152479.pdf [file sj-pdf-1-ajs-10.1177_03635465231152479.pdf]

**Predictors of Return to Work After Arthroscopic Rotator Cuff Repair - An Analysis of 1502 Cases**

**Appendix**

**Table A1.** Variables entered into the multiple logistic regression models for return to work at any level, and return to pre-injury levels of work 6 months following rotator cuff repair.

| <b>Demographic Variables</b>                                    |                                                     |
|-----------------------------------------------------------------|-----------------------------------------------------|
| Age                                                             | Years                                               |
| Sex                                                             | Male, female                                        |
| Insurance Type                                                  | Private, public, self-funded, worker's compensation |
| Duration of symptoms                                            | Months                                              |
| Side of injury                                                  | Right, left                                         |
| Specific initiating injury                                      | Yes, no                                             |
| Work-related injury (different to worker's compensation status) | Yes, no                                             |
| Previous shoulder dislocation                                   | Yes, no                                             |
| Previous shoulder treatment                                     | Yes, no                                             |
| <b>Pre-Injury Variables</b>                                     |                                                     |
| Pre-Injury Level of Work                                        | None, light, moderate, strenuous labor              |
| Pre-Injury Level of Sport                                       | None, hobby, club, national                         |

| <b>Preoperative (Post-Injury, Pre-Surgery) Variables</b> |                                            |
|----------------------------------------------------------|--------------------------------------------|
| Level of work                                            | None, light, moderate, strenuous labor     |
| Level of sport                                           | None, hobby, club, national                |
| Frequency of pain with activity                          | Never, monthly, weekly, daily, always      |
| Frequency of pain with sleep                             | Never, monthly, weekly, daily, always      |
| Frequency of extreme pain                                | Never, monthly, weekly, daily, always      |
| Level of pain at rest                                    | None, mild, moderate, severe, very severe  |
| Level of pain with overhead activity                     | None, mild, moderate, severe, very severe  |
| Level of pain at sleep                                   | None, mild, moderate, severe, very severe  |
| Patient-rated stiffness                                  | Not at all, a little moderate, quite, very |
| Difficulty with reaching behind the back                 | None, mild, moderate, severe, very severe  |
| Difficulty with reaching overhead                        | None, mild, moderate, severe, very severe  |
| Overall rating of shoulder                               | Very bad, bad, poor, fair, good            |
| Forward flexion (passive range of motion)                | Degrees                                    |
| Abduction (passive range of motion)                      | Degrees                                    |
| External Rotation (passive range of motion)              | Degrees                                    |
| Internal Rotation (passive range of motion)              | Degrees                                    |
| Abduction (strength)                                     | Newtons                                    |
| Adduction (strength)                                     | Newtons                                    |
| External Rotation (strength)                             | Newtons                                    |
| Internal Rotation (strength)                             | Newtons                                    |
| Behind the Back Lift-Off (strength)                      | Newtons                                    |
|                                                          |                                            |

| <b>Intraoperative Variables</b> |                                  |
|---------------------------------|----------------------------------|
| Tear Thickness                  | Partial, full                    |
| Osteoarthritis                  | Yes, no                          |
| Tissue quality                  | Fair, good, very good, excellent |
| Tissue mobility                 | Fair, good, very good, excellent |
| Repair quality                  | Fair, good, very good, excellent |
| Anteroposterior tear dimension  | Millimeters                      |
| Mediolateral tear dimension     | Millimeters                      |
| Operative time                  | Minutes                          |
